# Supplementary material
Source: publisher figshare collection journal article supplement (https://acs.figshare.com/ndownloader/files/5972934)
Supplement: Supplementary file 1 [file 5972934]

## Supporting Information

### Optimizing Binding Energies of Key Intermediates for CO<sub>2</sub> Hydrogenation to Methanol over Oxide-Supported Copper

Shyam Kattel<sup>1,#</sup>, Binhang Yan<sup>1,2,#</sup>, Yixiong Yang,<sup>3</sup> Jingguang G. Chen<sup>1,4\*</sup> and Ping Liu<sup>1\*</sup>

*1 Chemistry Department, Brookhaven National Laboratory, Upton, New York 11973, United States*

*2 Department of Chemical Engineering, Tsinghua University, Beijing 100084, China*

*3 Chemistry Department, Stony Brook University, Stony Brook, NY 11794, United States*

*4 Department of Chemical Engineering, Columbia University, New York, New York 10027, United States*

#Dr. S Kattel and Dr. BH Yan contributed equally to this work and should be regarded as co-first authors.

\*Corresponding authors: [jgchen@columbia.edu](mailto:jgchen@columbia.edu); [pingliu3@bnl.gov](mailto:pingliu3@bnl.gov)

The KMC simulations were performed at experimental conditions: ratio of partial pressure of H<sub>2</sub> and CO<sub>2</sub> (P<sub>H2</sub>/P<sub>CO2</sub>) = 3:1 and temperature (T) = 220 °C. The P<sub>H2</sub>/P<sub>CO2</sub> ratio in our KMC simulations is adjusted by the rate of dissociative adsorption of H<sub>2</sub> and adsorption of molecular CO<sub>2</sub>. The elementary steps included in the KMC simulation are summarized in Table S1 in Supporting Information, where the corresponding reaction rates were computed based on calculated reaction barriers using the Arrhenius equation given by  $\nu \exp(-E_a/k_B T)$ .  $\nu$  is the prefactor. For all the surface reactions, a prefactor of  $1.0 \times 10^{13} \text{ s}^{-1}$  was used.  $E_a$  is the activation energy of the corresponding reaction obtained from DFT calculations,  $k_B$  is the Boltzmann constant and T is the temperature of the KMC simulations. For the reactions involving molecules in the gas-phase, the contribution from the entropy was taken from the NIST database [1] and was included in the KMC simulations. The adsorption coefficient was calculated according to  $P A_{\text{site}} \sigma / \sqrt{2 \pi m k_B T}$  [2], where P,  $A_{\text{site}}$ ,  $\sigma$  and m represent the pressure of the adsorbed gas, the area of a single site, the sticking coefficient and the mass of adsorption gas, respectively.

**Table S1.** DFT calculated energetics and corresponding rates for the elementary steps included in the KMC simulations at 220 °C for CO<sub>2</sub> hydrogenation to methanol.

| Reactions                                           | TiO <sub>2</sub> /Cu   |            |                                               | ZrO <sub>2</sub> /Cu   |            |                                               |
|-----------------------------------------------------|------------------------|------------|-----------------------------------------------|------------------------|------------|-----------------------------------------------|
|                                                     | E <sub>a</sub><br>(eV) | ΔE<br>(eV) | Rate<br>(s <sup>-1</sup> site <sup>-1</sup> ) | E <sub>a</sub><br>(eV) | ΔE<br>(eV) | Rate<br>(s <sup>-1</sup> site <sup>-1</sup> ) |
| *H + *CO <sub>2</sub> → *HOCO + *                   | 0.89                   | 0.07       | 7.96×10 <sup>3</sup>                          | 0.76                   | 0.18       | 1.70×10 <sup>5</sup>                          |
| *HOCO + * → *CO + *OH                               | 0.68                   | -0.20      | 1.12×10 <sup>6</sup>                          | 0.72                   | -0.99      | 4.36×10 <sup>5</sup>                          |
| *CO → CO(g) + *                                     | 1.21                   | 1.21       | 4.26                                          | 1.86                   | 1.86       | 9.64×10 <sup>-7</sup>                         |
| *H + *OH → *H <sub>2</sub> O + *                    | 0.61                   | -0.12      | 5.80×10 <sup>6</sup>                          | 1.36                   | 1.03       | 1.25×10 <sup>-1</sup>                         |
| *H <sub>2</sub> O → H <sub>2</sub> O(g) + *         | 0.83                   | 0.83       | 3.27×10 <sup>4</sup>                          | 0.99                   | 0.99       | 7.56×10 <sup>2</sup>                          |
| *H + *CO → *HCO + *                                 | 0.73                   | 0.47       | 3.44×10 <sup>5</sup>                          | 0.88                   | 0.39       | 1.01×10 <sup>4</sup>                          |
| *H + *HCO → *H <sub>2</sub> CO + *                  | 0.54                   | -0.23      | 3.02×10 <sup>7</sup>                          | 0.44                   | -0.69      | 3.17×10 <sup>8</sup>                          |
| *H + *H <sub>2</sub> CO → *H <sub>3</sub> CO + *    | 0.14                   | -0.86      | 3.70×10 <sup>11</sup>                         | 0.43                   | -1.10      | 4.02×10 <sup>8</sup>                          |
| *H + *H <sub>3</sub> CO → *CH <sub>3</sub> OH + *   | 0.77                   | -0.08      | 1.34×10 <sup>5</sup>                          | 1.11                   | 1.07       | 4.49×10 <sup>1</sup>                          |
| *CH <sub>3</sub> OH → CH <sub>3</sub> OH(g) + *     | 0.88                   | 0.88       | 1.01×10 <sup>4</sup>                          | 1.10                   | 1.10       | 5.68×10 <sup>1</sup>                          |
| *H + *CO <sub>2</sub> → *HCOO + *                   | 0.46                   | -0.63      | 1.98×10 <sup>8</sup>                          | 0.14                   | -0.58      | 3.70×10 <sup>11</sup>                         |
| *H + *HCOO → *HCOOH + *                             | 0.85                   | 0.30       | 2.04×10 <sup>4</sup>                          | 0.80                   | 0.70       | 6.63×10 <sup>4</sup>                          |
| *H + *HCOOH → *H <sub>2</sub> COOH + *              | 0.67                   | 0.01       | 1.41×10 <sup>6</sup>                          | 0.28                   | -0.98      | 1.37×10 <sup>10</sup>                         |
| *H <sub>2</sub> COOH + * → *H <sub>2</sub> CO + *OH | 0.79                   | 0.57       | 8.38×10 <sup>4</sup>                          | 1.32                   | 0.67       | 3.20×10 <sup>-1</sup>                         |

E<sub>a</sub> = activation energy, ΔE = reaction energy

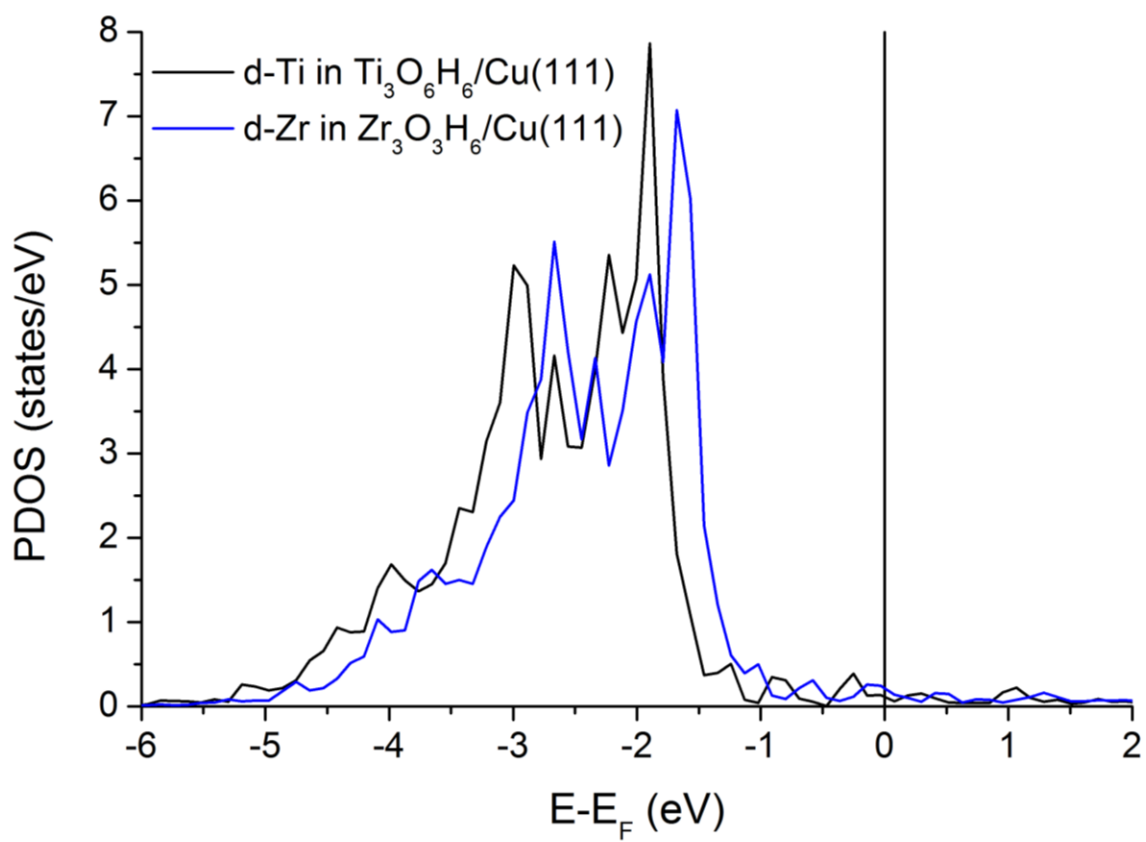

**Figure S1.** Partial density of states (PDOS) of Ti and Zr d-states in  $\text{Ti}_3\text{O}_6\text{H}_6/\text{Cu}(111)$  and  $\text{Zr}_3\text{O}_6\text{H}_6/\text{Cu}(111)$ , respectively.

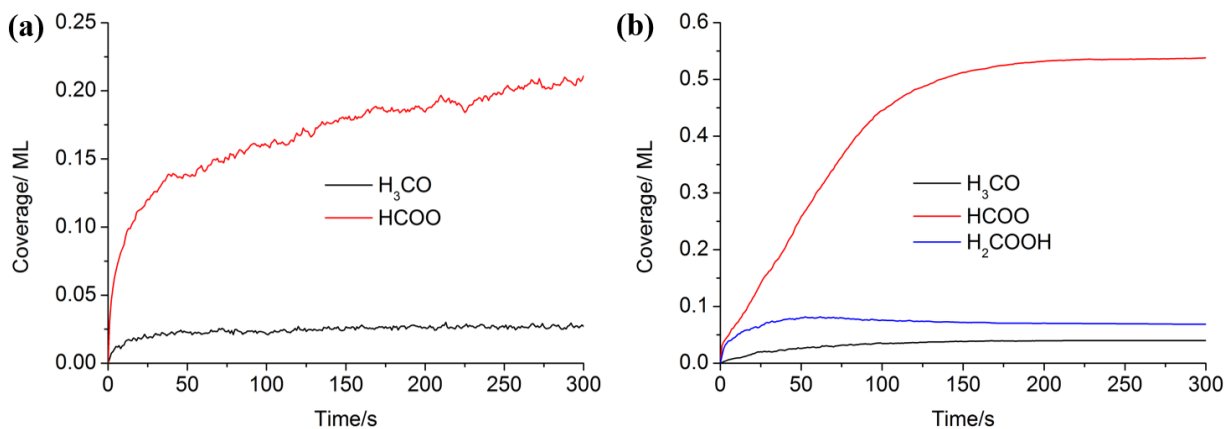

**Figure S2.** KMC(simulation time = 300 s)-simulated coverage of surface formate-like species over Cu/TiO<sub>2</sub> (a) and Cu/ZrO<sub>2</sub> (b) catalysts during the CO<sub>2</sub> hydrogenation reaction at T = 220 °C.

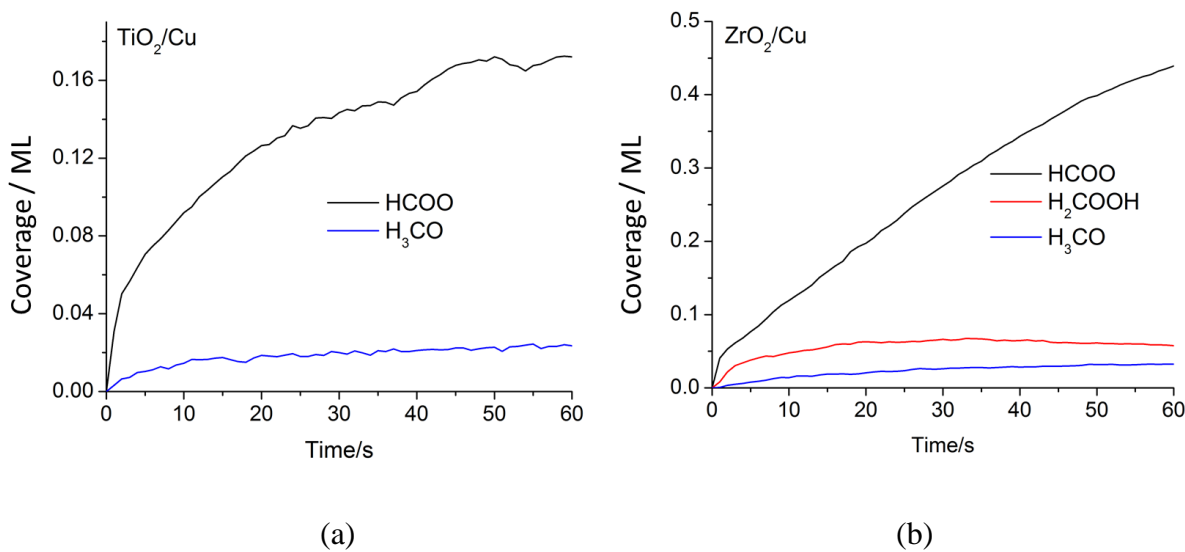

**Figure S3.** KMC(simulation time = 60 s)-simulated coverage of surface formate-like species over Cu/TiO<sub>2</sub> (a) and Cu/ZrO<sub>2</sub> (b) catalysts during the CO<sub>2</sub> hydrogenation reaction at T = 220 °C.

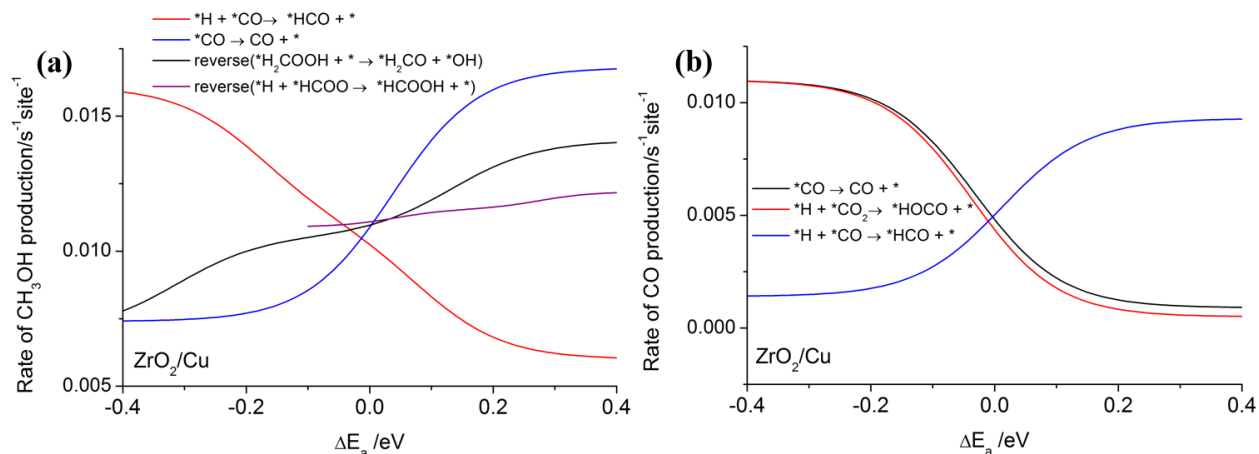

**Figure S4.** Sensitivity analysis based on KMC simulations on the controlling-steps for  $\text{CH}_3\text{OH}$  production (a) and CO production (b) during the  $\text{CO}_2$  hydrogenation reaction on  $\text{Cu}/\text{TiO}_2$  at  $T = 220^\circ\text{C}$ .

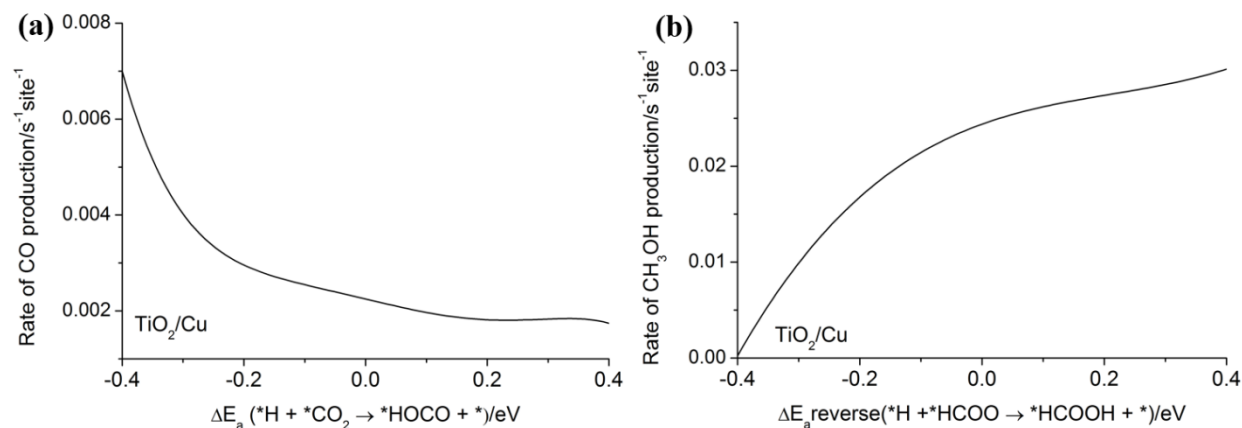

**Figure S5.** Sensitivity analysis based on KMC simulations on the controlling-steps for  $\text{CH}_3\text{OH}$  production (a) and CO production (b) during the  $\text{CO}_2$  hydrogenation reaction on  $\text{Cu}/\text{ZrO}_2$  at  $T = 220^\circ\text{C}$ .

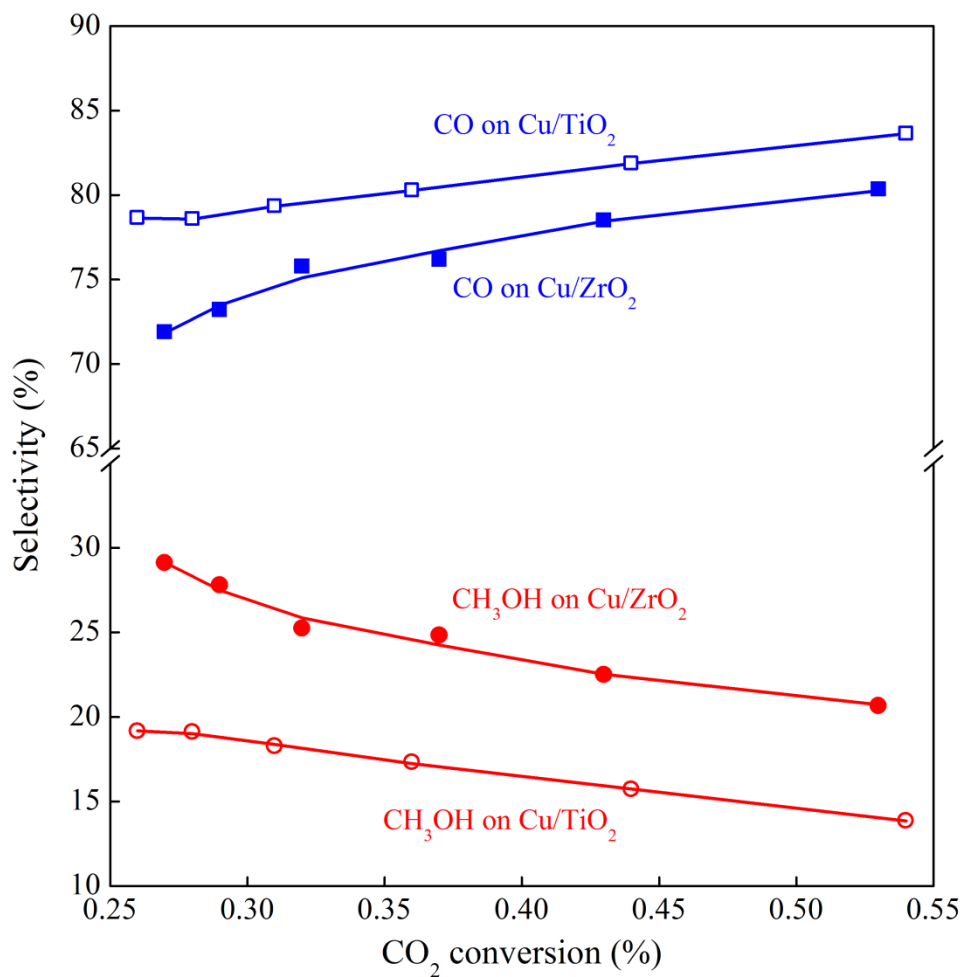

**Figure S6.** Selectivity to CH<sub>3</sub>OH and CO of Cu/ZrO<sub>2</sub> and Cu/TiO<sub>2</sub> catalysts at different CO<sub>2</sub> conversions by varying the total flow rate of the reactants (reaction conditions: 220 °C, CO<sub>2</sub>:H<sub>2</sub>:N<sub>2</sub> = 1:3:1, 30 mg Cu/ZrO<sub>2</sub>, 400 mg Cu/TiO<sub>2</sub>)

## References

1. <http://cccbdb.nist.gov>
2. A.P.J. Jansen, "An introduction to Monte Carlo simulations of surface reactions", .  
[http://arxiv.org/abs/cond-mat/0303028/\(2003\)](http://arxiv.org/abs/cond-mat/0303028/(2003)) and <http://www.catalysis.nl/~chembond/kMC/>.
